# Supplementary material for: Quantification of Phycocyanin in Inland Waters through Remote Measurement of Ratios and Shifts in Reflection Spectral Peaks
Source: MDPI journal article supplement (doi:10.3390/rs13163335), 2021-08-23
Supplement: s1 [file s1]

## Supplementary Materials

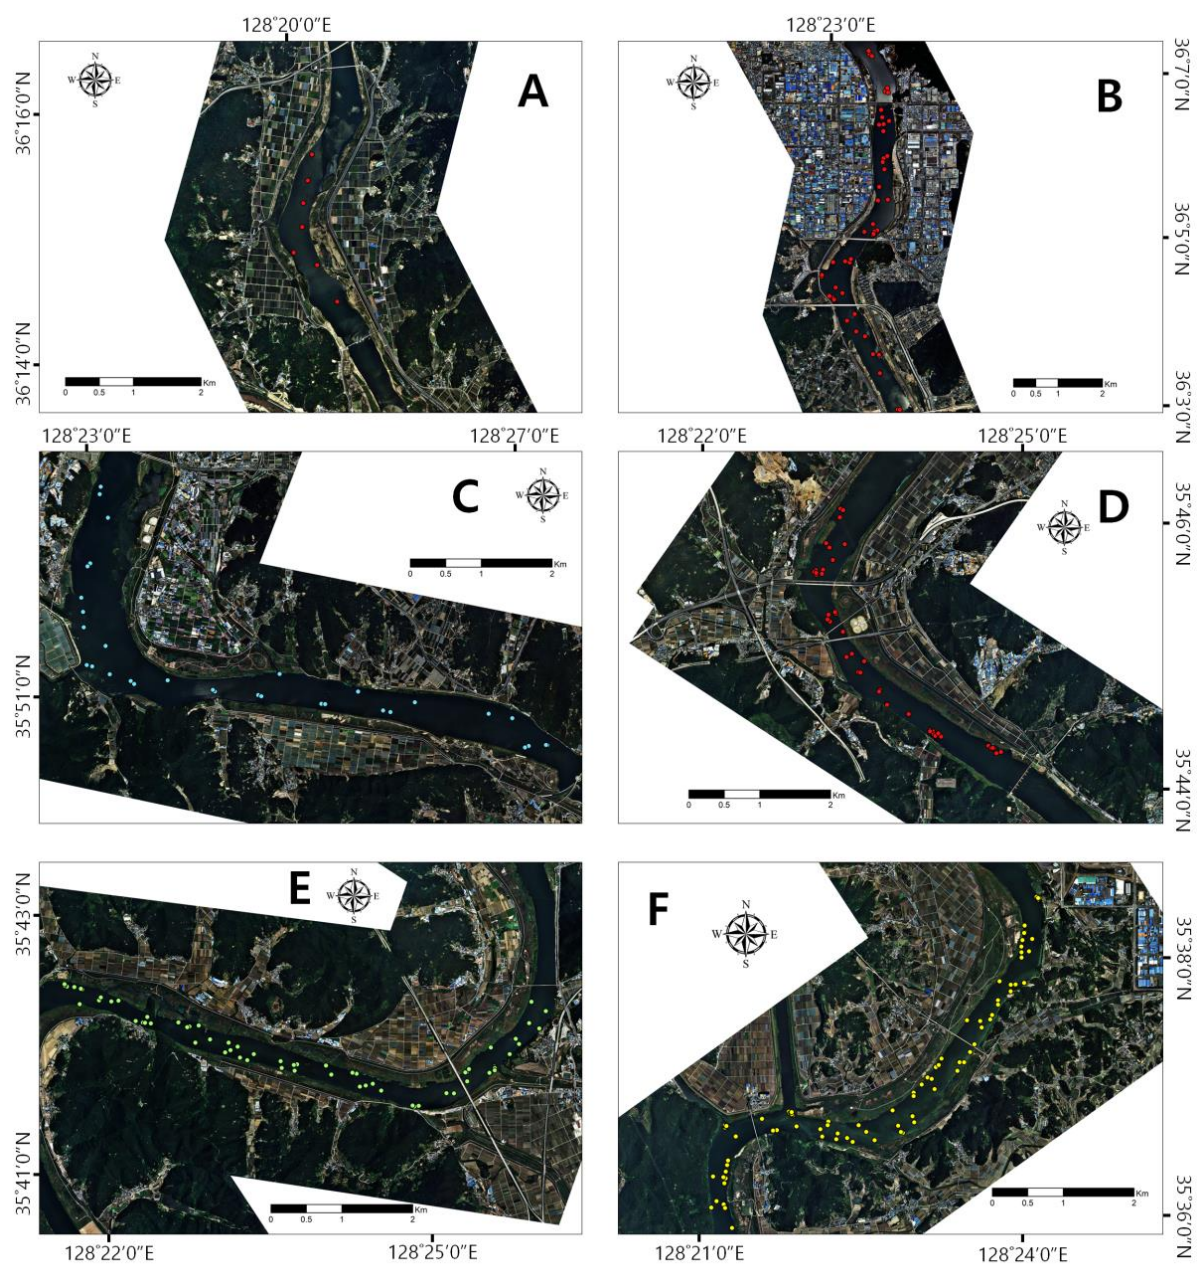

**Figure S1.** Map of sampling points in zones A–F. The sky blue, light green, yellow, and red dots are sampling points in 2015, 2016, 2017, and 2018, respectively.

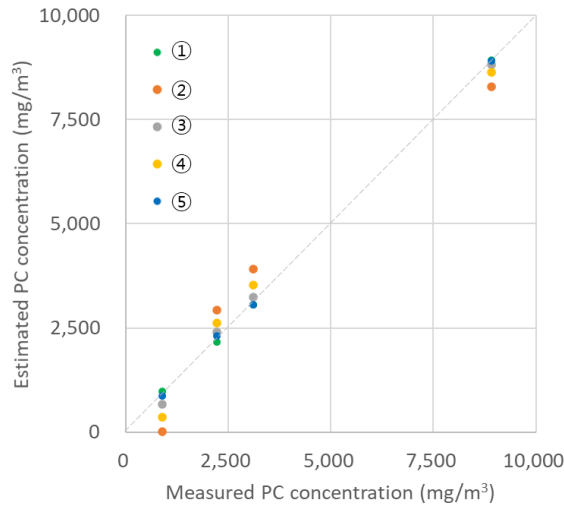

| No | Expressions                                                                                                                                        | RMSE (mg/m <sup>3</sup> ) |
|----|----------------------------------------------------------------------------------------------------------------------------------------------------|---------------------------|
| ①  | $PC = f\left(\frac{R_{rs}(700_{peak})}{R_{rs}(620_{trough})}\right)$                                                                               | 63.7                      |
| ②  | $PC = f\left(\frac{\Delta\lambda_{peak}}{\max(\Delta\lambda_{peak})}\right)$                                                                       | 754.5                     |
| ③  | $PC = f\left(\frac{R_{rs}(700_{peak})}{R_{rs}(620_{trough})} \times \frac{\Delta\lambda_{peak}}{\max(\Delta\lambda_{peak})}\right)$                | 162.2                     |
| ④  | $PC = f\left(\left(\frac{\Delta\lambda_{peak}}{\max(\Delta\lambda_{peak})}\right)^a\right)$                                                        | 415.9                     |
| ⑤  | $PC = f\left(\frac{R_{rs}(700_{peak})}{R_{rs}(620_{trough})} \times \left(\frac{\Delta\lambda_{peak}}{\max(\Delta\lambda_{peak})}\right)^a\right)$ | 52.1                      |

**Figure S2.** Plot of the predicted values by candidate equations versus measured data from the lab experiment: ① band ratio of 700<sub>peak</sub>/620<sub>trough</sub>, ② distance of peak shifting, ③ band ratio × distance, ④ power function of distance, and ⑤ band ratio × power function of distance. As seen in the figure, model ⑤, which is identical to Equation (6), shows the best fit (although the 700<sub>peak</sub>/620<sub>trough</sub> model (green dots) also showed a good fit, but was slightly worse). Note that, although samples of six different concentrations of phycocyanin were tested in the experiment (Table 1), we used only four of these concentrations above; for the other two concentrations, the reflectance signals were too weak to distinguish peaks or troughs.

**Table S1.** Descriptive statistics of phycocyanin and chlorophyll-*a* concentrations for the samples collected in the Nakdong River from 2015 to 2018.

| Year  | Date    | Area (weir)              | Samples<br>(n) | Chlorophyll- <i>a</i> (mg/m <sup>3</sup> ) |       |      | Phycocyanin (mg/m <sup>3</sup> ) |       |       |
|-------|---------|--------------------------|----------------|--------------------------------------------|-------|------|----------------------------------|-------|-------|
|       |         |                          |                | Mean                                       | Max   | Min  | Mean                             | Max   | Min   |
| 2015  | Sept 9  | Kangjung-Goryeong (C)    | 20             | 7.1                                        | 11.4  | 3.0  | 32.3                             | 56.1  | 11.7  |
|       | Oct 6   |                          | 15             | 10.6                                       | 16.7  | 5.3  | 4.7                              | 8.6   | 1.8   |
| 2016  | Jun 2   | Hapcheon-Changnyeong (E) | 14             | 57.4                                       | 150.9 | 14.0 | 62.8                             | 211.7 | 5.7   |
|       | Jun 17  |                          | 12             | 28.0                                       | 67.2  | 8.6  | 36.2                             | 153.0 | 7.2   |
|       | Aug 4   |                          | 12             | 17.3                                       | 28.7  | 8.6  | 23.8                             | 85.6  | 1.4   |
|       | Aug 11  |                          | 8              | 29.7                                       | 61.6  | 10.8 | 147.5                            | 229.8 | 101.2 |
|       | Aug 25  |                          | 10             | 107.6                                      | 243.9 | 30.2 | 189.3                            | 333.7 | 66.1  |
|       | Sept 8  |                          | 10             | 10.5                                       | 17.2  | 6.6  | 6.7                              | 26.8  | 1.2   |
| 2017  | Aug 12  | Hapcheon-Changnyeong (F) | 12             | 11.9                                       | 49.5  | 5.4  | 10.6                             | 89.1  | 0.6   |
|       | Sept 13 |                          | 12             | 16.5                                       | 25.9  | 5.7  | 5.6                              | 9.9   | 1.8   |
|       | Sept 14 |                          | 12             | 16.7                                       | 23.1  | 11.4 | 18.1                             | 32.1  | 8.5   |
|       | Sept 18 |                          | 10             | 33.5                                       | 47.1  | 17.8 | 21.7                             | 29.6  | 10.8  |
|       | Sept 19 |                          | 12             | 32.7                                       | 48.5  | 22.8 | 42.8                             | 114.1 | 3.9   |
|       | Sept 25 |                          | 12             | 28.5                                       | 42.1  | 14.2 | 13.5                             | 28.3  | 8.1   |
|       | Nov 9   |                          | 10             | 10.6                                       | 16.2  | 4.8  | 4.7                              | 7.4   | 3.6   |
|       | Nov 21  |                          | 10             | 2.2                                        | 3.8   | 1.3  | 1.8                              | 2.6   | 1.0   |
|       | Nov 27  |                          | 8              | 1.4                                        | 2.4   | 0.4  | 0.1                              | 0.2   | 0.1   |
|       | Nov 28  |                          | 6              | 0.7                                        | 0.9   | 0.4  | 0.1                              | 0.2   | 0.1   |
| 2018  | Jul 17  | Chilgok (B)              | 4              | 18.6                                       | 28.0  | 15.0 | 3.4                              | 8.8   | 1.3   |
|       |         | Dalseong (D)             | 7              | 7.4                                        | 13.2  | 5.3  | 6.6                              | 12.9  | 0.4   |
|       | Jul 18  | Chilgok (B)              | 9              | 14.4                                       | 21.7  | 8.0  | 4.2                              | 8.5   | 2.2   |
|       |         | Dalseong (D)             | 7              | 7.3                                        | 11.3  | 3.1  | 21.8                             | 25.9  | 15.4  |
|       | Aug 2   | Dalseong (D)             | 3              | 51.9                                       | 76.1  | 31.5 | 177.1                            | 242.2 | 94.8  |
|       |         | Gumi (A)                 | 7              | 24.3                                       | 52.7  | 14.4 | 4.7                              | 11.4  | 1.7   |
|       | Sept 18 | Chilgok (B)              | 10             | 8.3                                        | 11.8  | 5.2  | 3.1                              | 4.3   | 1.6   |
|       |         | Dalseong (D)             | 7              | 10.1                                       | 14.6  | 6.5  | 4.5                              | 6.7   | 2.1   |
|       | Oct 4   | Chilgok (B)              | 7              | 16.3                                       | 21.0  | 11.3 | 2.6                              | 3.9   | 1.9   |
|       |         | Dalseong (D)             | 7              | 7.9                                        | 10.5  | 5.1  | 1.7                              | 2.6   | 1.1   |
|       | Oct 11  | Chilgok (B)              | 7              | 1.6                                        | 2.3   | 0.8  | 0.4                              | 0.5   | 0.4   |
|       |         | Dalseong (D)             | 5              | 4.6                                        | 5.4   | 4.0  | 0.6                              | 0.7   | 0.4   |
|       | Oct 25  | Chilgok (B)              | 8              | 11.4                                       | 12.7  | 9.9  | 0.6                              | 0.7   | 0.4   |
|       |         | Dalseong (D)             | 7              | 27.1                                       | 66.3  | 8.1  | 0.7                              | 1.3   | 0.4   |
| Total |         |                          | 300            | 20.3                                       | 243.9 | 0.4  | 25.8                             | 333.7 | 0.1   |
